# Supplementary material for: PEGylation of Goldbody: PEG-aided conformational engineering of peptides on gold nanoparticles
Source: Royal Society of Chemistry journal article supplement (doi:10.1039/d2ra03903f), 2022-01-01
Supplement: d2ra03903f1.pdf [file d2ra03903f1.pdf]

## PEGylation of Goldbody: PEG-Aided Conformational Engineering of Peptides on Gold Nanoparticles

Tiange Gao,<sup>†a</sup> Yuan-Yuan Liu,<sup>†a</sup> Chenxi Lou,<sup>a</sup> Haifang Wang,<sup>\*a</sup> Yuanfang Liu,<sup>a,b</sup> and Aoneng Cao<sup>\*a</sup>

<sup>a</sup> Institute of Nanochemistry and Nanobiology, Shanghai University, Shanghai 200444, China.

<sup>b</sup> Beijing National Laboratory for Molecular Sciences, College of Chemistry and Molecular Engineering, Peking University, Beijing 100871, China.

<sup>†</sup> These authors contributed equally.

E-mails: hwang@shu.edu.cn, ancao@shu.edu.cn

### Supplementary data

**Table S1.** Sequences and properties of the designed peptides

| Peptide | Peptide sequence | pI   | MW (Da) | $\epsilon$ ( $M^{-1} \cdot cm^{-1}$ ) |
|---------|------------------|------|---------|---------------------------------------|
| Pep1    | CGSTIYASYYESGHGC | 5.08 | 1697.81 | 4595                                  |
| Pep1m   | CGSTIYASYYESGHG  | 5.24 | 1594.67 | 4470                                  |
| Pep2    | CSAWYGTLYEYDGC   | 3.67 | 1630.76 | 10095                                 |
| Pep2m   | CSAWYGTLYEYDG    | 3.67 | 1527.62 | 9970                                  |

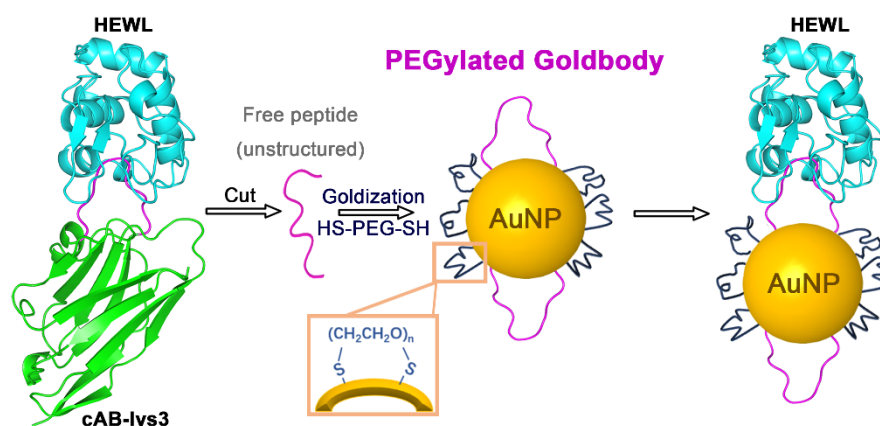

**Fig. S1** Scheme of the design of the PEGylated anti-lysozyme Goldbody. PEG with two terminal –SH groups is used to effectively aid the conformational engineering of the CDR fragments (purple chain) of the natural antibody on AuNPs, and the PEGylated anti-lysozyme Goldbody can specifically bind to lysozyme (HEWL).

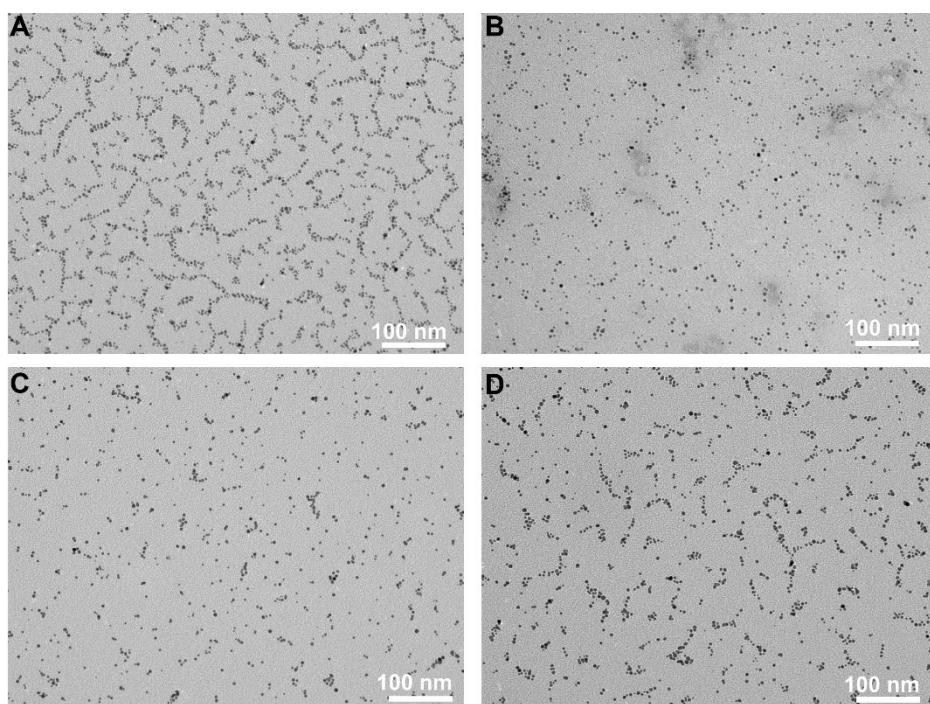

**Fig. S2** TEM images of (A) AuNP-5Pep1, (B) AuNP-5Pep1-15(HS-PEG600-COOH), (C) AuNP-5Pep1-30(HS-PEG300-COOH), and (D) AuNP-5Pep1-15(HS-PEG2000-SH).

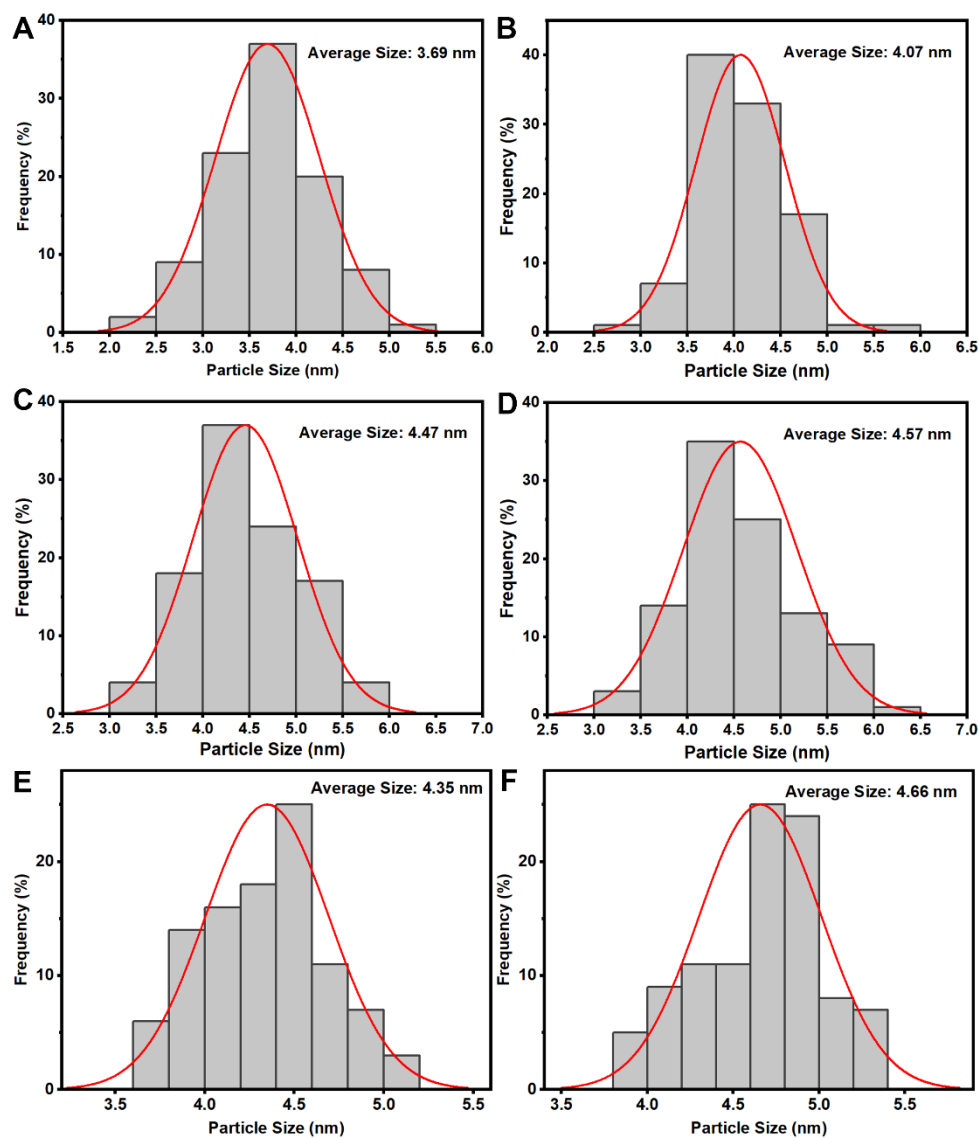

**Fig. S3** Size distributions from the TEM images of (A) AuNPs ( $3.69 \pm 0.56$  nm), (B) AuNP-5Pep1 ( $4.07 \pm 0.48$  nm), (C) AuNP-5Pep1-15(HS-PEG600-COOH) ( $4.47 \pm 0.57$  nm), (D) AuNP-5Pep1-15(HS-PEG600-SH) ( $4.57 \pm 0.61$  nm), (E) AuNP-5Pep1-30(HS-PEG300-COOH) ( $4.35 \pm 0.35$  nm), and (F) AuNP-5Pep1-15(HS-PEG2000-SH) ( $4.66 \pm 0.36$  nm).

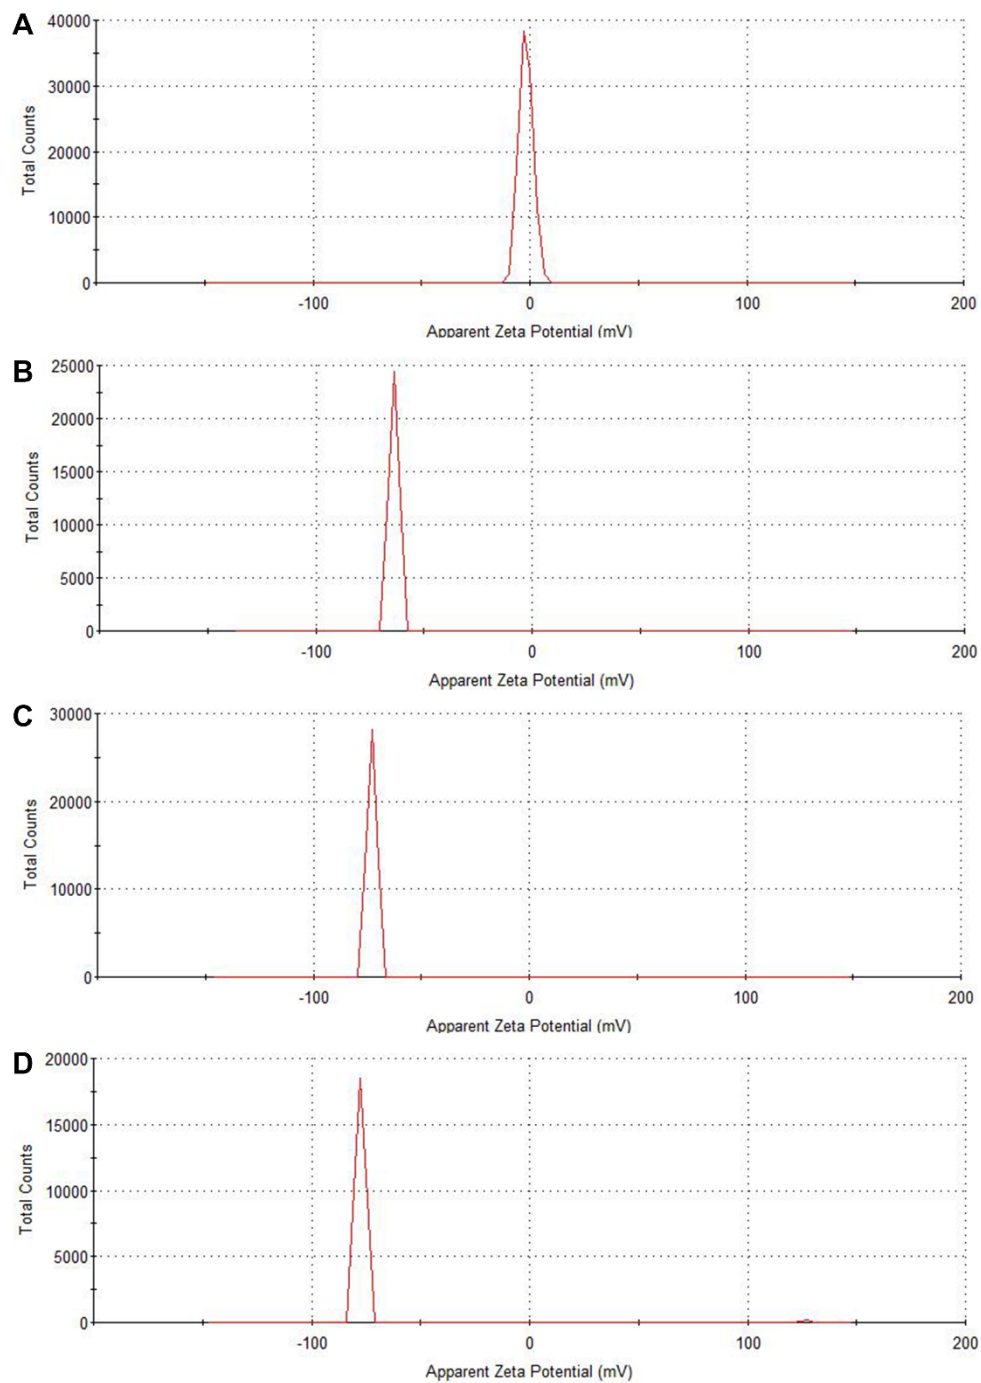

**Fig. S4** Zeta potentials of (A) AuNPs, (B) AuNP-5Pep1, (C) AuNP-5Pep1-15(HS-PEG600-COOH), and (D) AuNP-5Pep1-15(HS-PEG600-SH).

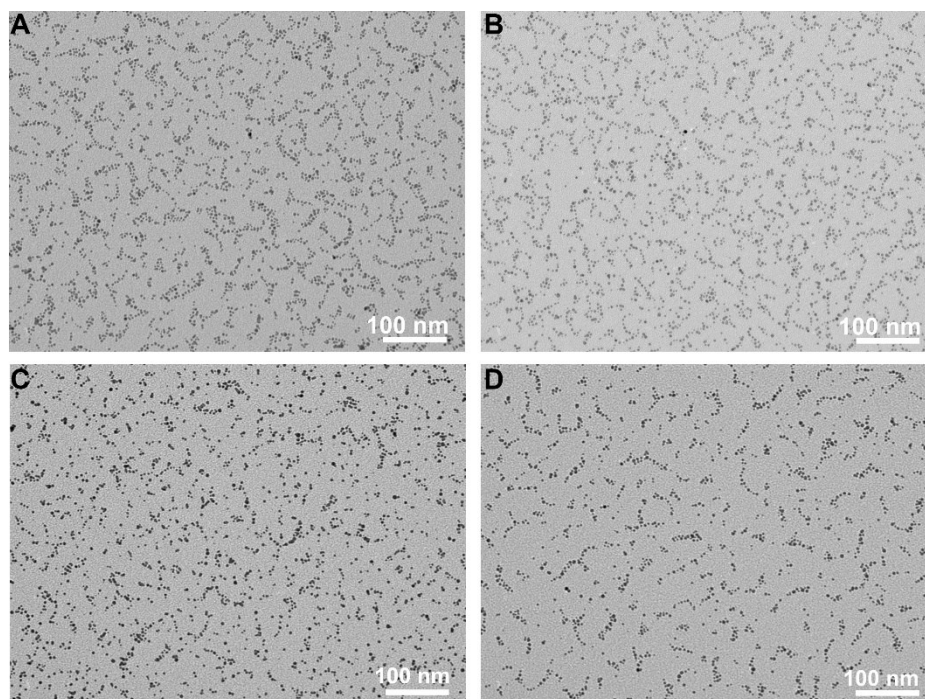

**Fig. S5** TEM images of (A) AuNP-5Pep2, (B) AuNP-5Pep2-15(HS-PEG600-COOH), (C) AuNP-5Pep2-30(HS-PEG300-COOH), and (D) AuNP-5Pep2-15(HS-PEG2000-SH).

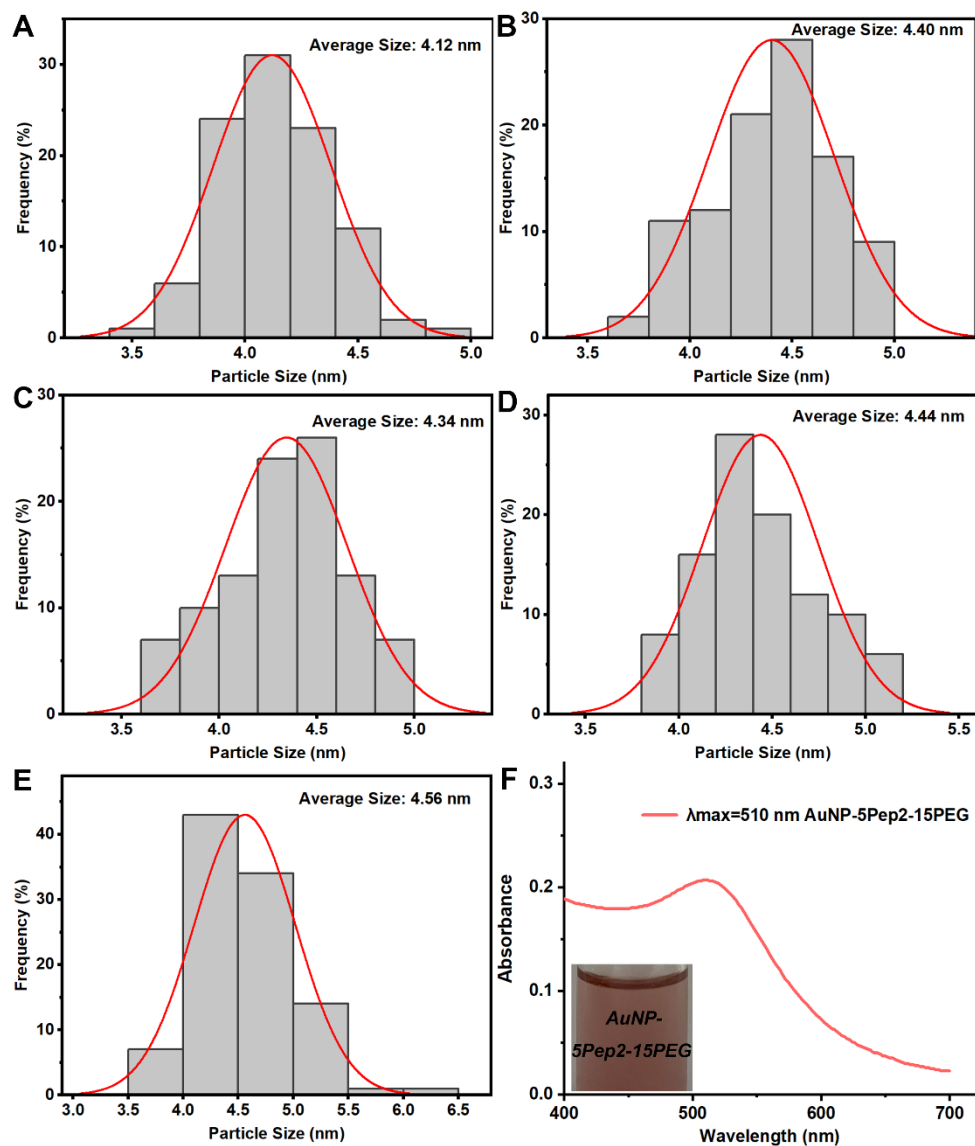

**Fig. S6** Size distributions from the TEM images of (A) AuNP-5Pep2 ( $4.12 \pm 0.26$  nm), (B) AuNP-5Pep2-15(HS-PEG600-COOH) ( $4.40 \pm 0.78$  nm), (C) AuNP-5Pep2-15(HS-PEG600-SH) ( $4.34 \pm 0.31$  nm), (D) AuNP-5Pep2-30(HS-PEG300-COOH) ( $4.44 \pm 0.31$  nm), and (E) AuNP-5Pep2-15(HS-PEG2000-SH) ( $4.56 \pm 0.46$  nm). (F) UV-vis spectrum and the optical picture of the AuNP-5Pep2-15(HS-PEG600-SH) solution.

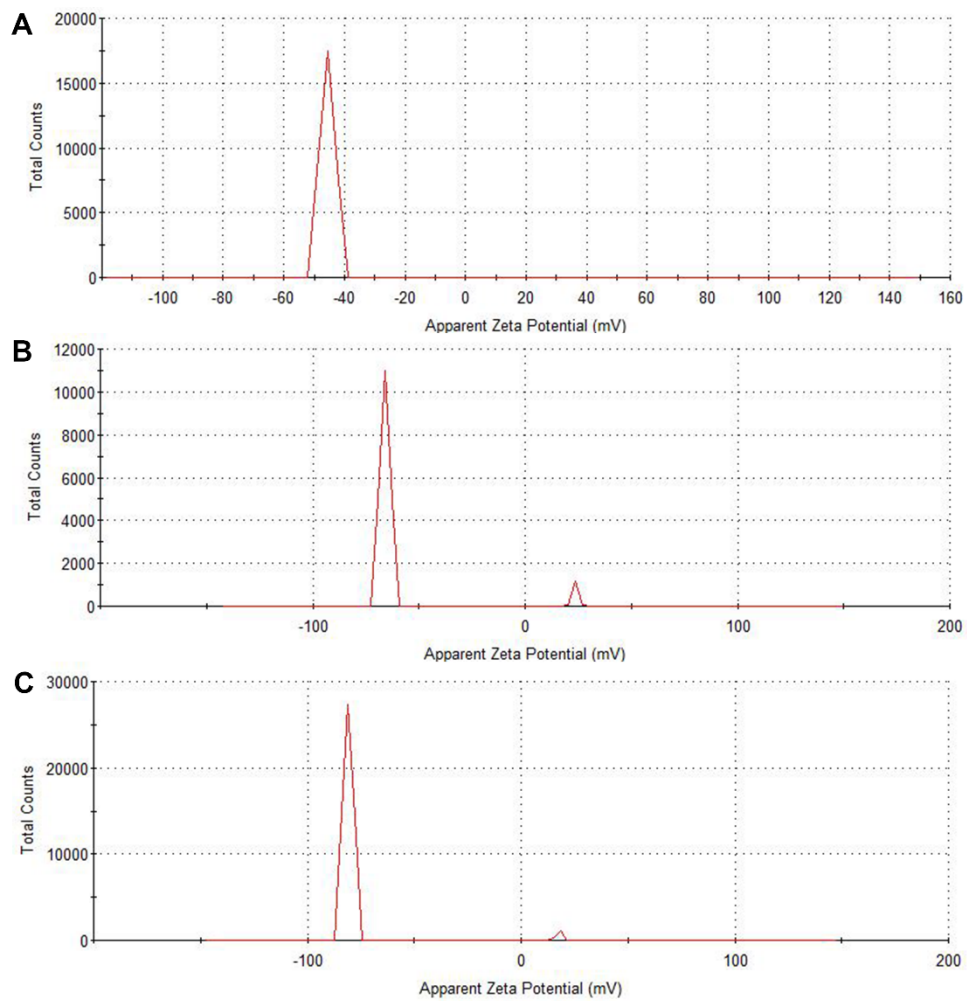

**Fig. S7** Zeta-potentials of (A) AuNP-5Pep2, (B) AuNP-5Pep2-15(HS-PEG600-COOH), and (C) AuNP-5Pep2-15(HS-PEG600-SH).

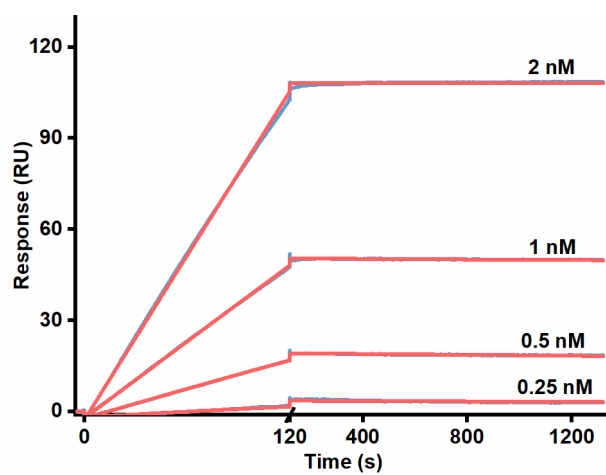

**Fig. S8** SPR binding kinetics of AuNP-5Pep2-15(HS-PEG600-SH) with the immobilized EGFR. Red curves are the fitting lines.
